# Supplementary material for: Forest Canopy Water Content Monitoring Using Radiative Transfer Models and Machine Learning
Source: MDPI journal article supplement (doi:10.3390/f14071418), 2023-07-11
Supplement: s1 [file s1]

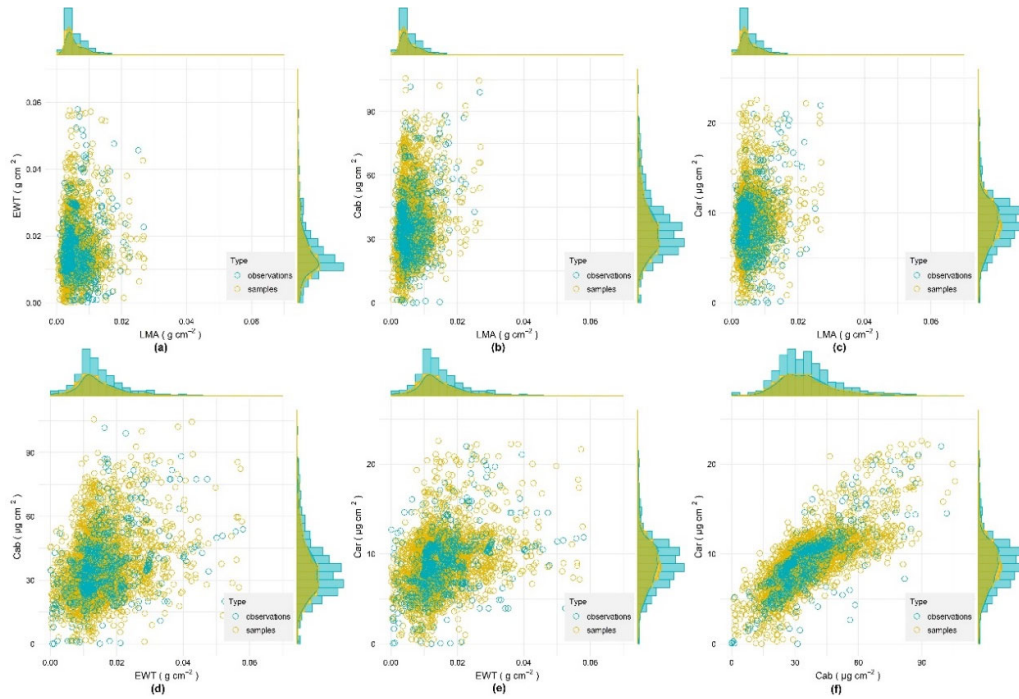

Figure S1. Constrained random samples of herbaceous LMA, EWT, Cab, Car based on field observations using Gaussian copula for (a) LMA vs. EWT; (b) LMA vs. Cab; (c) LMA vs. Car; (d) EWT vs. Cab; (e) EWT vs. Car; (f) Cab vs. Car.

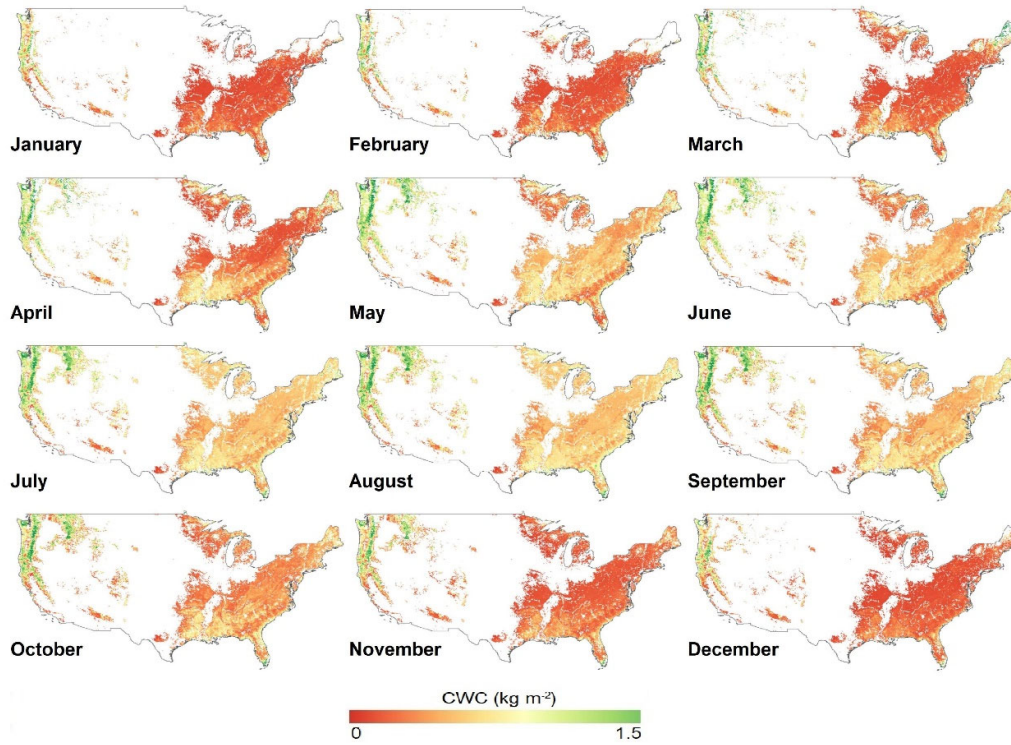

Figure S2. Monthly mean CWC spatial distribution of CONUS at 500 meters resolution in 2017–2021 based on PRO4SAIL inversion.

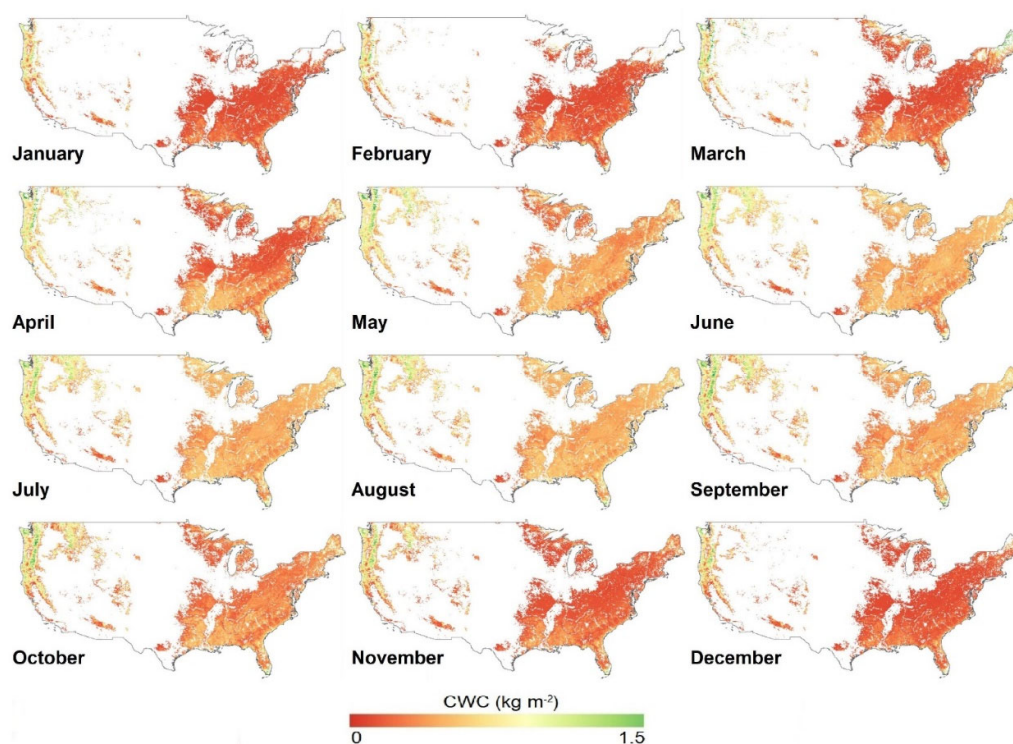

Figure S3. Monthly mean CWC spatial distribution of CONUS at 500 meters resolution in 2017–2021 based on PRO4SAIL2 inversion.

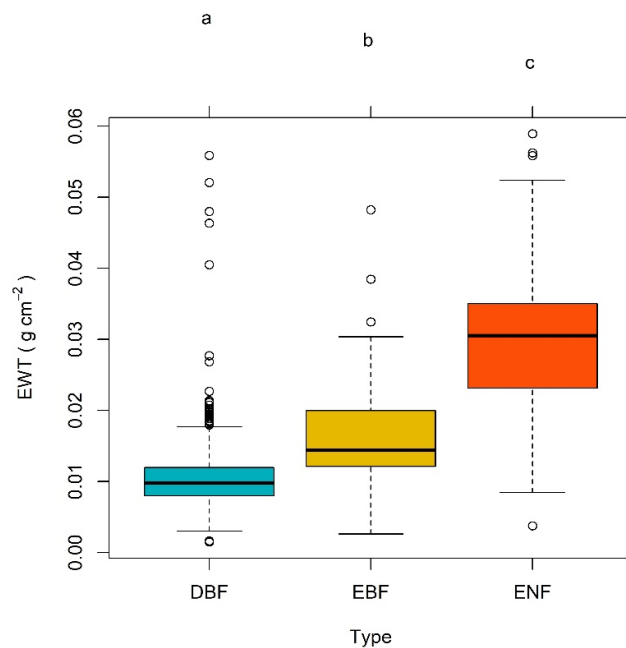

Figure S4. Box plot for the EWT of NEON field observations between deciduous and evergreen forests. The statistical significance is shown by lowercase letters at the level of  $p < 0.001$  using one-way analysis of variance (ANOVA).

Table S1. Parameterization of RTMs' inputs for forest CWC inversion.

| Canopy | Parameters                                         | Units                          | Symbol | 4SAIL                   |        |                                           |        | 4SAIL2                                    |        | GeoSail                                   |        |
|--------|----------------------------------------------------|--------------------------------|--------|-------------------------|--------|-------------------------------------------|--------|-------------------------------------------|--------|-------------------------------------------|--------|
|        |                                                    |                                |        | Understory              |        | Overstory                                 |        | Parameterization                          | Source | Parameterization                          | Source |
|        |                                                    |                                |        | Parameterization        | Source | Parameterization                          | Source |                                           |        |                                           |        |
|        | Sun zenith angle                                   | (°)                            | tts    | 20 - 30                 | [1]    | 20 - 30                                   | [1]    | 20 - 30                                   | [1]    | 20 - 30                                   | [1]    |
|        | View zenith angle                                  | (°)                            | tto    | 0                       | [2]    | 0                                         | [2]    | 0                                         | [2]    | 0                                         | [2]    |
|        | Relative azimuth angle                             | (°)                            | psi    | 0                       |        | 0                                         |        | 0                                         |        | 0                                         |        |
|        | Leaf area index                                    | m <sup>2</sup> m <sup>-2</sup> | LAI    | 0.09 - 1.89<br>(3.5, 4) | NEON   | 0 - 8<br>(3.5, 4)                         | [2-4]  | 0 - 8<br>(3.5, 4)                         | [2-4]  | 0 - 8<br>(3.5, 4)                         | [2-4]  |
|        | Crown cover fraction                               | /                              | Cv     | /                       | /      | LAI/6                                     | [5]    | LAI/6                                     | [5]    | LAI/6                                     | [5]    |
|        | Leaf inclination distribution function (LIDF) type | /                              | LIDF   | 35-80<br>(60, 12)       | [1]    | Plagiophile,<br>Erectophile,<br>Spherical | [6]    | Plagiophile,<br>Erectophile,<br>Spherical | [6]    | Plagiophile,<br>Erectophile,<br>Spherical | [6]    |
|        | Tree shape factor                                  | /                              | CHW    |                         |        | 1 - 3                                     |        | 1 - 3                                     |        | 1 - 3                                     |        |
|        | Hot spot                                           | /                              | hspot  | 0.1 – 0.5<br>(0.2, 0.2) | [1]    | 0.5/LAI                                   |        | 0.5/LAI                                   |        | 0.5/LAI                                   |        |

Connect to the table above

| Leaf | Parameters          | Units               | Symbol | 4SAIL                  |                             |                             |                             | 4SAIL2                      |                             | GeoSail                     |                             |
|------|---------------------|---------------------|--------|------------------------|-----------------------------|-----------------------------|-----------------------------|-----------------------------|-----------------------------|-----------------------------|-----------------------------|
|      |                     |                     |        | Understory             |                             | Overstory                   |                             | Parameterization            | Source                      | Parameterization            | Source                      |
|      |                     |                     |        | Parameterization       | Source                      | Parameterization            | Source                      |                             |                             |                             |                             |
| Leaf | structure parameter | /                   | N      | 1.1 – 3<br>(1.7, 0.32) | LOPEX93,<br>ANGERS,<br>NEON | 1.05 – 2.74<br>(1.54, 0.27) | LOPEX93,<br>ANGERS,<br>NEON | 1.05 – 2.74<br>(1.54, 0.27) | LOPEX93,<br>ANGERS,<br>NEON | 1.05 – 2.74<br>(1.54, 0.27) | LOPEX93,<br>ANGERS,<br>NEON |
|      | Dry mass content    | g cm <sup>-2</sup>  | LMA    | Gaussian copula        | NEON                        | Gaussian copula             | NEON                        | Gaussian copula             | NEON                        | Gaussian copula             | NEON                        |
|      | Water content       | g cm <sup>-2</sup>  | EWT    |                        |                             |                             |                             |                             |                             |                             |                             |
|      | Chlorophyll content | µg cm <sup>-2</sup> | Cab    |                        |                             |                             |                             |                             |                             |                             |                             |
|      | Carotenoid content  | µg cm <sup>-2</sup> | Car    |                        |                             |                             |                             |                             |                             |                             |                             |
|      | Brown pigment       | /                   | Cbp    | 0                      | [2-4,6]                     | 0                           | [2-4,6]                     | 0                           | [2-4,6]                     | 0                           | [2-4,6]                     |
|      |                     |                     |        |                        |                             |                             |                             |                             |                             |                             |                             |
| Soil | Soil factor         | /                   | psoil  | 0.1 – 1<br>(0.8, 0.6)  | [2-4]                       | /                           | /                           | /                           | /                           | /                           | /                           |

## Reference

1. Trombetti, M.; Riaño, D.; Rubio, M.A.; Cheng, Y.B.; Ustin, S.L. Multi-temporal vegetation canopy water content retrieval and interpretation using artificial neural networks for the continental USA. *Remote Sensing of Environment* **2008**, *112*, 203-215, doi:10.1016/j.rse.2007.04.013.
2. Campos-Taberner, M.; Moreno-Martinez, A.; Javier Garcia-Haro, F.; Camps-Valls, G.; Robinson, N.P.; Kattge, J.; Running, S.W. Global Estimation of Biophysical Variables from Google Earth Engine Platform. *Remote Sensing* **2018**, *10*, 1167, doi:10.3390/rs10081167.
3. García-Haro, F.J.; Campos-Taberner, M.; Muñoz-Marí, J.; Laparra, V.; Camacho, F.; Sánchez-Zapero, J.; Camps-Valls, G. Derivation of global vegetation biophysical parameters from EUMETSAT Polar System. *ISPRS Journal of Photogrammetry and Remote Sensing* **2018**, *139*, 57-74, doi:10.1016/j.isprsjprs.2018.03.005.
4. García-Haro, F.J.; Campos-Taberner, M.; Moreno, A.; Torbern Tagesson, H.; Camacho, F.; Martinez, B.; Sanchez, S.; Piles, M.; Camps-Valls, G.; Yebra, M.; et al. A global canopy water content product from AVHRR/Metop. *Isprs Journal of Photogrammetry and Remote Sensing* **2020**, *162*, 77-93, doi:10.1016/j.isprsjprs.2020.02.007.
5. le Maire, G.; Marsden, C.; Verhoef, W.; Ponzoni, F.J.; Lo Seen, D.; Begue, A.; Stape, J.-L.; Nouvellon, Y. Leaf area index estimation with MODIS reflectance time series and model inversion during full rotations of Eucalyptus plantations. *Remote Sensing of Environment* **2011**, *115*, 586-599, doi:10.1016/j.rse.2010.10.004.
6. Quan, X.; Yebra, M.; Riano, D.; He, B.; Lai, G.; Liu, X. Global fuel moisture content mapping from MODIS. *International Journal of Applied Earth Observation and Geoinformation* **2021**, *101*, 102354, doi:10.1016/j.jag.2021.102354.
